# Supplementary material for: Genome-Wide Identification and Analysis of Polygalacturonase Genes in Solanum lycopersicum
Source: MDPI journal article supplement (doi:10.3390/ijms19082290), 2018-08-04
Supplement: s1 [file s1]

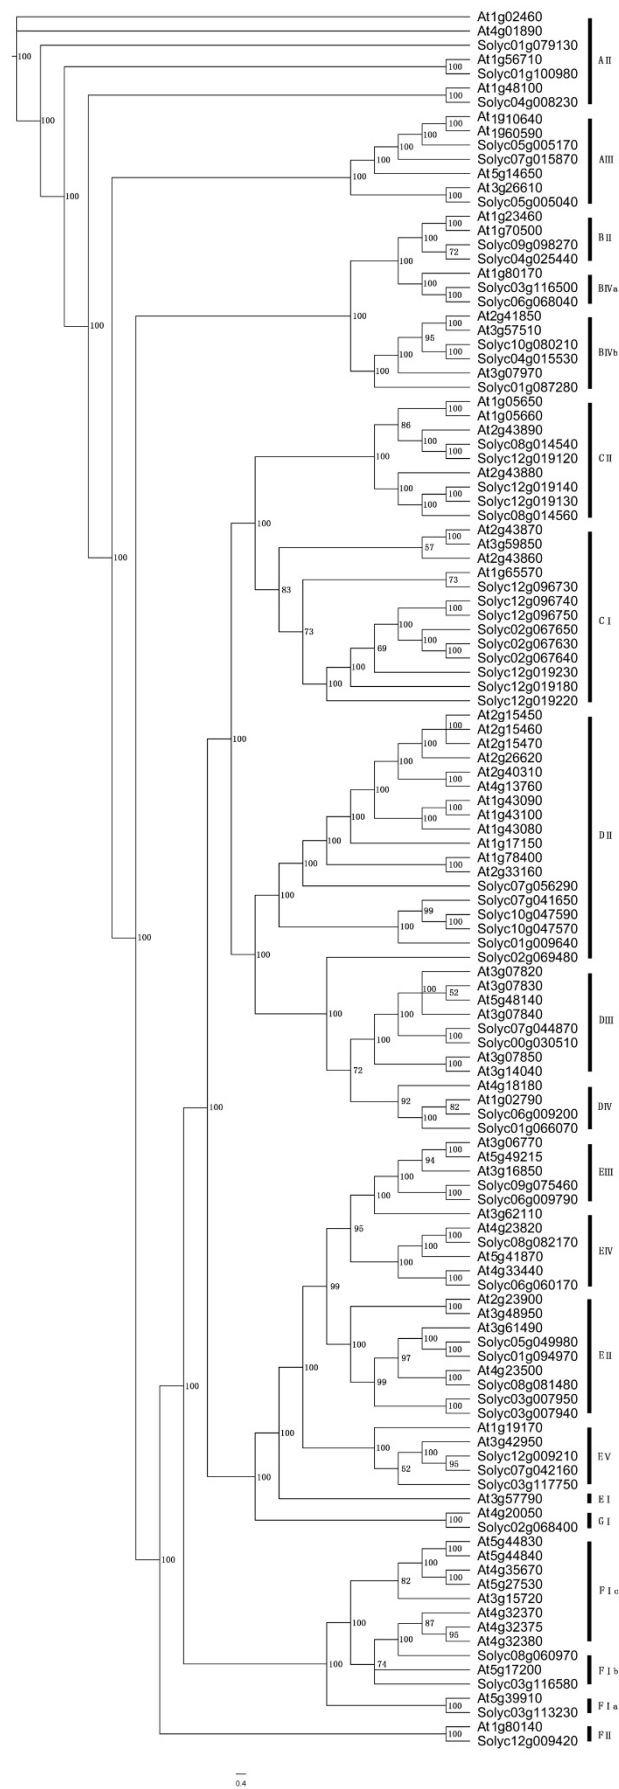

**Figure S1.** Phylogenetic analysis of PG genes in *Solanum lycopersicum* and *Arabidopsis thaliana*. The capital letters A to G represent the seven clade numbers.

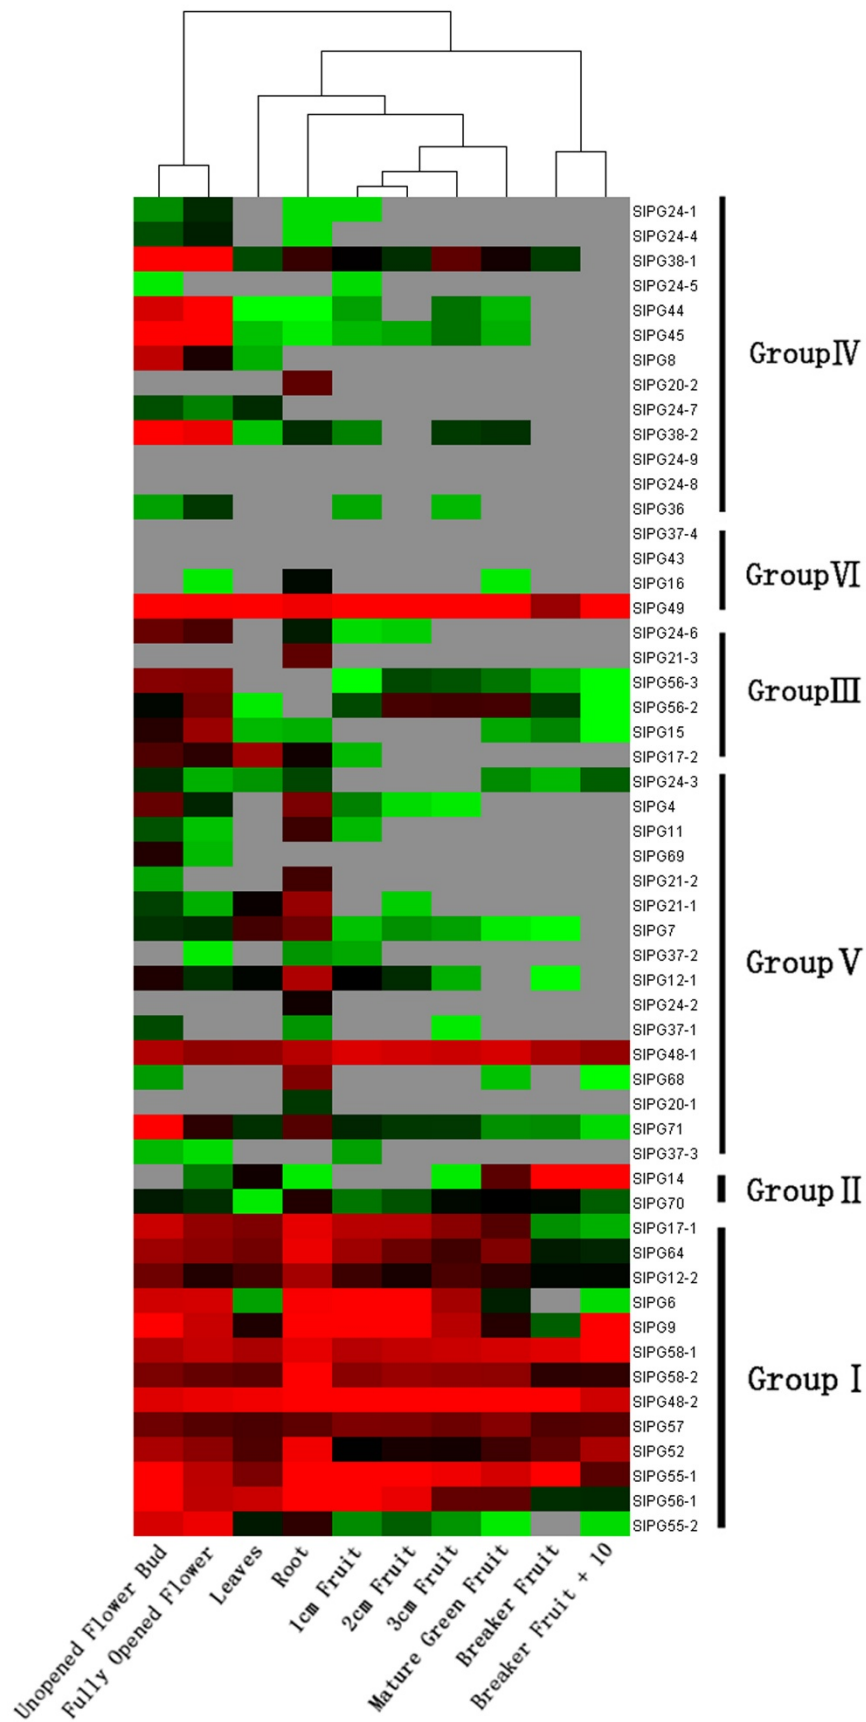

**Figure S2.** Hierarchical clustering and heat map generated by Cluster 3.0 using the acquired RNA-seq-based data of *SIPGs* from the Tomato eFP Browser, showing their expression levels in the ten different organs/tissues of *S. lycopersicum*.

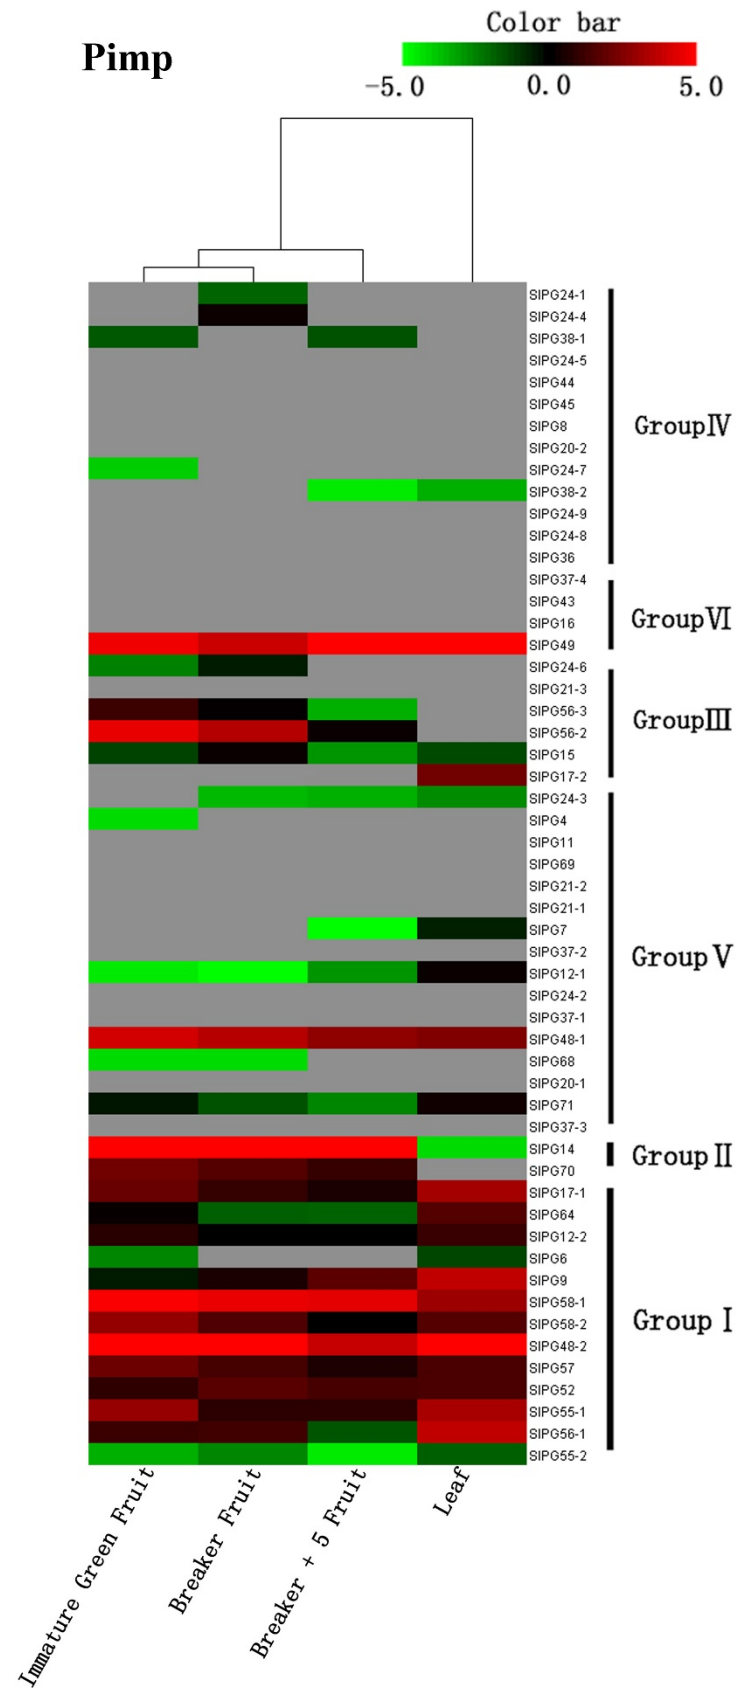

**Figure S3.** Hierarchical clustering and heat map generated by Cluster 3.0 using the acquired RNA-seq-based data of *SIPGs* from the Tomato eFP Browser, showing their expression levels in the fruit developmental process of *Solanum lycopersicum* L. cv Pimp.

## M82

### Group IV

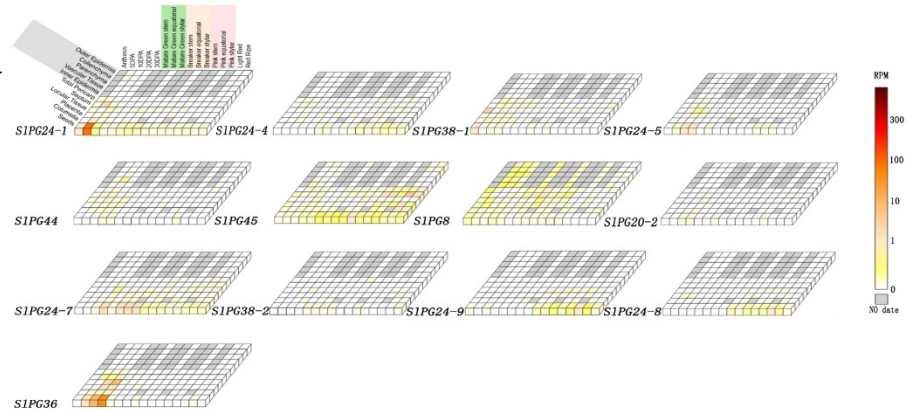

## Group VI

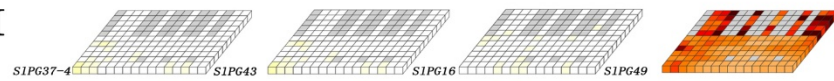

## Group III

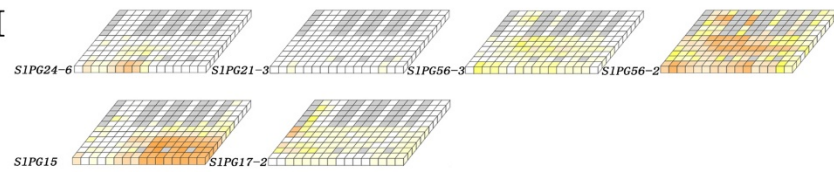

## Group V

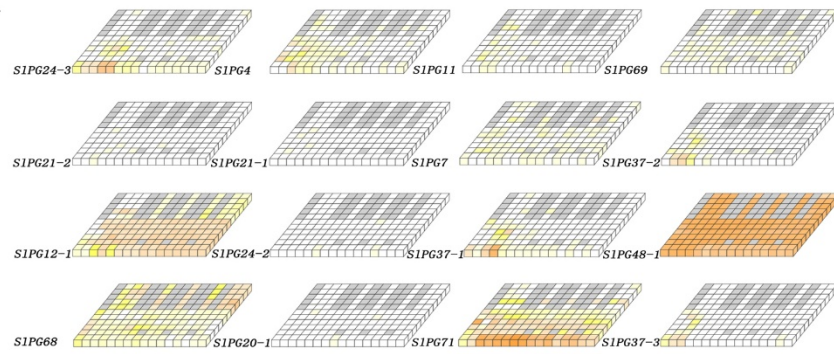

## Group II

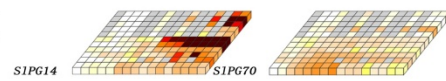

## Group I

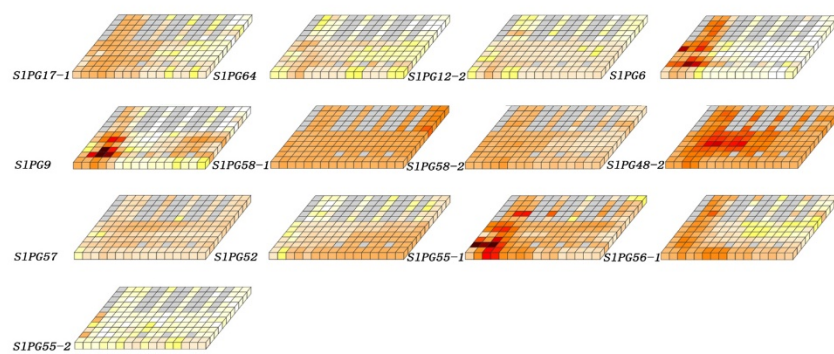

**Figure S4.** Heat map generated by the online tool of Tomato Expression Atlas showing the expression levels of *SIPGs* along spatial and developmental gradients of tomato fruit development of *S. lycopersicum* L. cv M82.

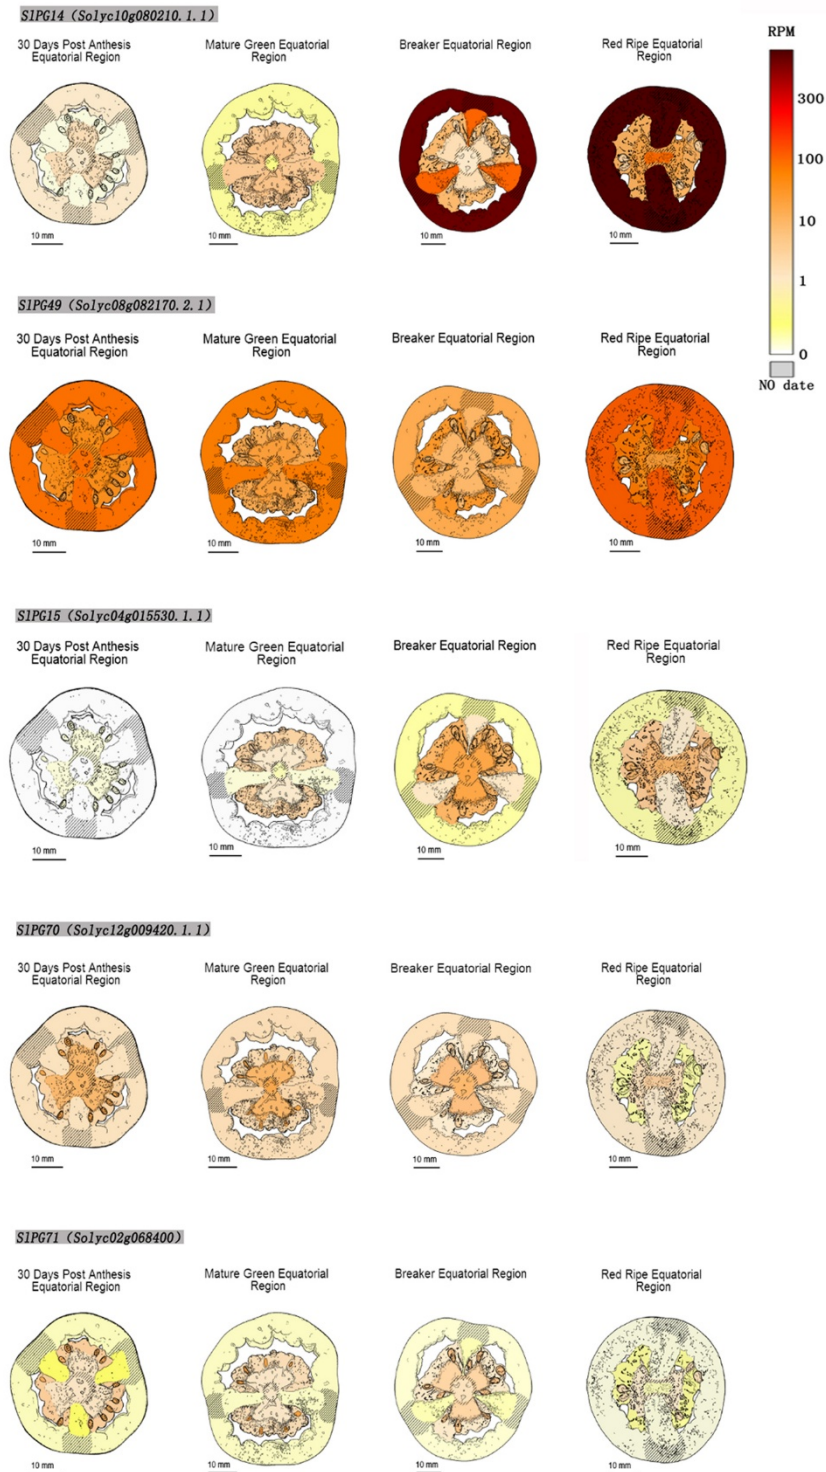

**Figure S5.** Heat map generated by the online tool of Tomato Expression Atlas showing the expression levels of the five fruit development related *SIPGs* in equatorial region of the four stages of tomato fruit development.



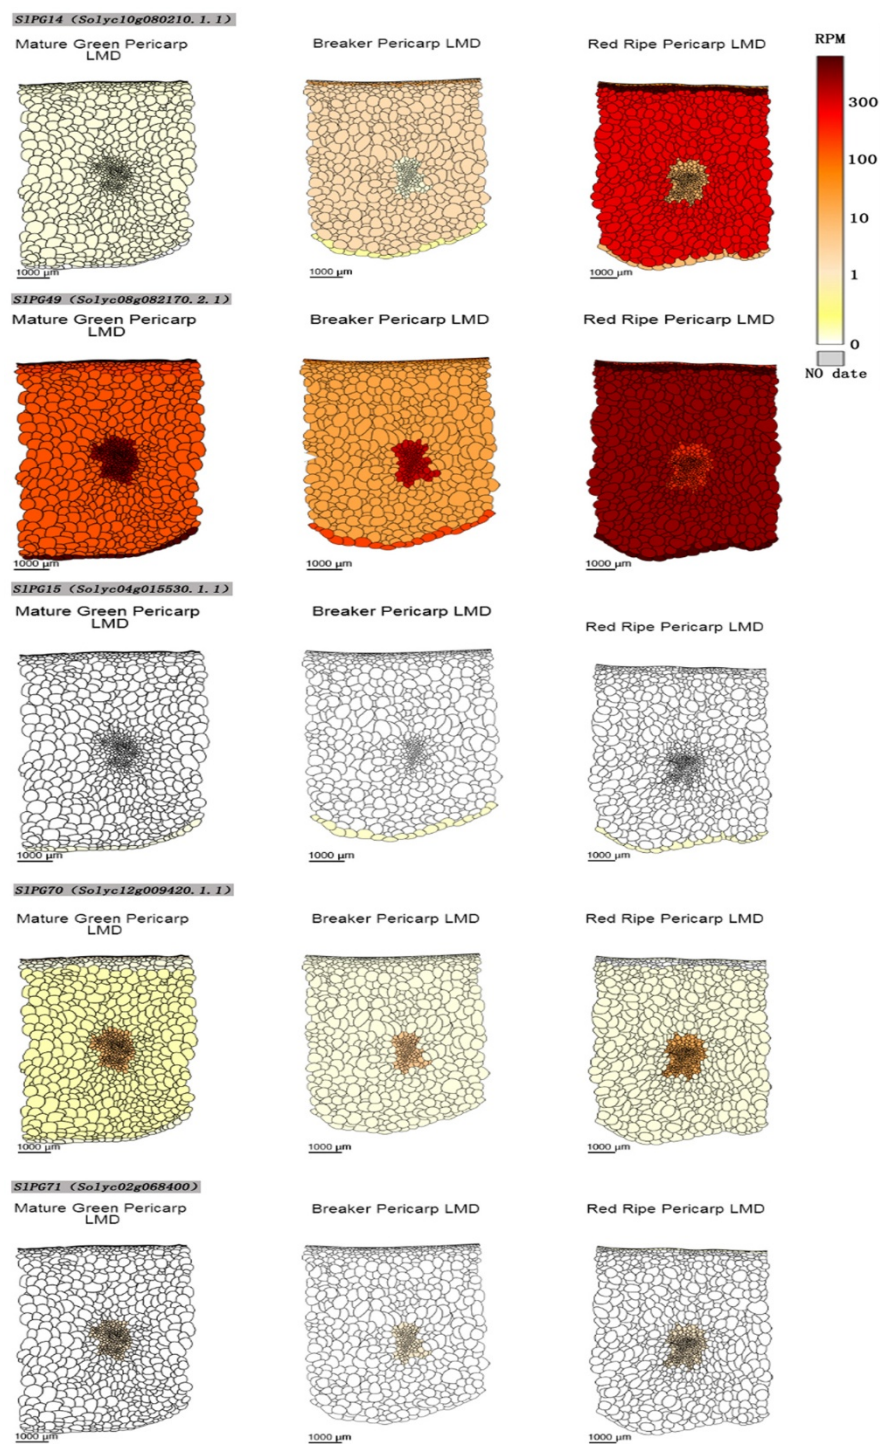

**Figure S6.** Heat map generated by the online tool of Tomato Expression Atlas showing the expression levels of the five fruit development related *SIPGs* in pericarp of the three stages of tomato fruit development.

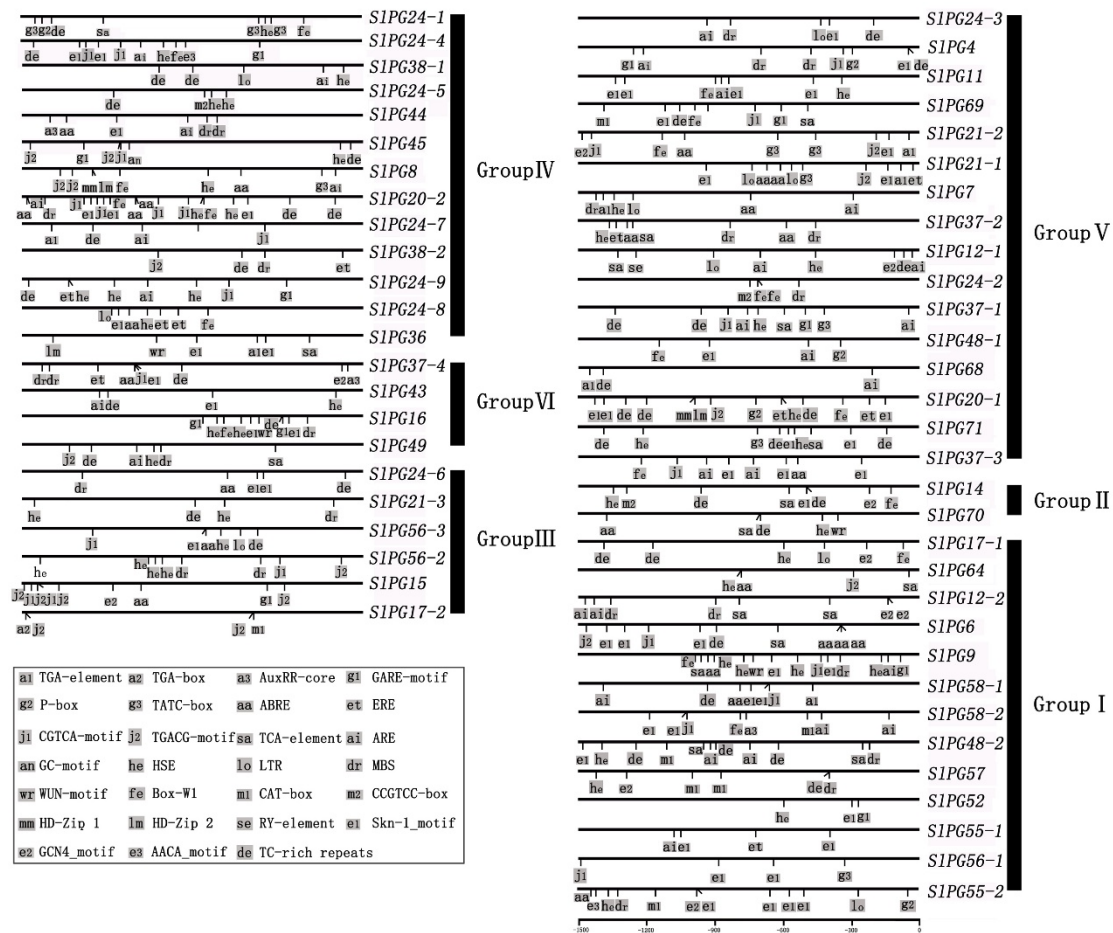

**Figure S7.** Cis-elements of plant hormones response, environmental stress response and specific organ/tissue development in promoter regions of the SIPG genes.

**Table S2.** The systematic names of PG genes in *Solanum lycopersicum*.

| <i>Arabidopsis</i> | <i>Arabidopsis</i> | Tomato   | Tomato gene ID     | Identity |
|--------------------|--------------------|----------|--------------------|----------|
| ATPG4              | AT1G02460          | SIPG4    | Solyc01g079130.1.1 | 66.3     |
| ATPG5              | AT4G01890          |          |                    |          |
| ATPG6              | AT1G48100          | SIPG6    | Solyc04g008230.2.1 | 65.1     |
| ATPG7              | AT1G56710          | SIPG7    | Solyc01g100980.2.1 | 60.8     |
| ATPG8              | AT1G10640          | SIPG8    | Solyc07g015870.2.1 | 56.6     |
| ATPG9              | AT1G60590          | SIPG9    | Solyc05g005170.2.1 | 65.7     |
| ATPG10             | AT5G14650          |          |                    |          |
| ATPG11             | AT3G26610          | SIPG11   | Solyc05g005040.2.1 | 57.4     |
| ATPG12             | AT1G23460          | SIPG12-1 | Solyc09g098270.2.1 | 65.6     |
|                    |                    | SIPG12-2 | Solyc04g025440.2.1 | 64.6     |
| ATPG13             | AT1G70500          |          |                    |          |
| ATPG14             | AT2G41850          | SIPG14   | Solyc10g080210.1.1 | 52       |
| ATPG15             | AT3G57510          | SIPG15   | Solyc04g015530.1.1 | 49.2     |
| ATPG16             | AT3G07970          | SIPG16   | Solyc01g087280.1.1 | 44.7     |
| ATPG17             | AT1G80170          | SIPG17-1 | Solyc03g116500.2.1 | 54.5     |
|                    |                    | SIPG17-2 | Solyc06g068040.2.1 | 52.6     |
| ATPG18             | AT1G05650          |          |                    |          |
| ATPG19             | AT1G05660          |          |                    |          |
| ATPG20             | AT2G43890          | SIPG20-1 | Solyc08g014540.1.1 | 63.3     |
|                    |                    | SIPG20-2 | Solyc12g019120.1.1 | 62.8     |
| ATPG21             | AT2G43880          | SIPG21-1 | Solyc12g019140.1.1 | 61.2     |
|                    |                    | SIPG21-2 | Solyc12g019130.1.1 | 59.5     |
|                    |                    | SIPG21-3 | Solyc08g014560.1.1 | 55.1     |
| ATPG22             | At2g43870          |          |                    |          |
| ATPG23             | AT3G59850          |          |                    |          |
| ATPG24             | AT1G65570          | SIPG24-1 | Solyc12g096740.1.1 | 49.1     |
|                    |                    | SIPG24-2 | Solyc12g019220.1.1 | 48.9     |
|                    |                    | SIPG24-3 | Solyc12g096730.1.1 | 48.9     |
|                    |                    | SIPG24-4 | Solyc12g096750.1.1 | 48.3     |
|                    |                    | SIPG24-5 | Solyc02g067650.1.1 | 48.3     |
|                    |                    | SIPG24-6 | Solyc12g019180.1.1 | 48.1     |
|                    |                    | SIPG24-7 | Solyc12g019230.1.1 | 47.3     |
|                    |                    | SIPG24-8 | Solyc02g067630.2.1 | 46.9     |
|                    |                    | SIPG24-9 | Solyc02g067640.2.1 | 46.9     |
| ATPG25             | AT2G43860          |          |                    |          |
| ATPG26             | AT2G15450          |          |                    |          |
| ATPG27             | AT2G15460          |          |                    |          |
| ATPG28             | AT2G15470          |          |                    |          |
| ATPG29             | AT2G26620          |          |                    |          |
| ATPG30             | AT2G40310          |          |                    |          |
| ATPG31             | AT4G13760          |          |                    |          |
| ATPG32             | AT1G43090          |          |                    |          |
| ATPG33             | AT1G43100          |          |                    |          |
| ATPG34             | AT1G43080          |          |                    |          |
| ATPG35             | AT1G17150          |          |                    |          |
| ATPG36             | AT1G78400          | SIPG36   | Solyc10g047570.1.1 | 40.8     |
| ATPG37             | AT2G33160          | SIPG37-1 | Solyc07g056290.1.1 | 49.1     |
|                    |                    | SIPG37-2 | Solyc07g041650.1.1 | 44.2     |
|                    |                    | SIPG37-3 | Solyc10g047590.1.1 | 40.8     |
|                    |                    | SIPG37-4 | Solyc01g009640.1.1 | 39.1     |
| ATPG38             | AT3G07820          | SIPG38-1 | Solyc00g030510.2.1 | 47.8     |
|                    |                    | SIPG38-2 | Solyc07g044870.2.1 | 47.3     |
| ATPG39             | AT3G07830          |          |                    |          |
| ATPG40             | AT3G07840          |          |                    |          |
| ATPG41             | AT5G48140          |          |                    |          |
| ATPG42             | AT3G07850          |          |                    |          |



**Table S2 continued**

| <i>Arabidopsis</i> | <i>Arabidopsis</i> | Tomato   | Tomato gene ID     | Identity |
|--------------------|--------------------|----------|--------------------|----------|
| ATPG43             | AT3G14040          | SIPG43   | Solyc02g069480.1.1 | 42       |
| ATPG44             | AT4G18180          | SIPG44   | Solyc01g066070.2.1 | 40.5     |
| ATPG45             | AT1G02790          | SIPG45   | Solyc06g009200.2.1 | 41.7     |
| ATPG46             | AT3G06770          |          |                    |          |
| ATPG47             | AT5G49215          |          |                    |          |
| ATPG48             | AT3G16850          | SIPG48-1 | Solyc06g009790.2.1 | 57.1     |
|                    |                    | SIPG48-2 | Solyc09g075460.2.1 | 56.3     |
| ATPG49             | AT4G23820          | SIPG49   | Solyc08g082170.2.1 | 70.7     |
| ATPG50             | AT5G41870          |          |                    |          |
| ATPG51             | AT3G62110          |          |                    |          |
| ATPG52             | AT4G33440          | SIPG52   | Solyc06g060170.2.1 | 64.4     |
| ATPG53             | AT2G23900          |          |                    |          |
| ATPG54             | AT3G48950          |          |                    |          |
| ATPG55             | AT3G61490          | SIPG55-1 | Solyc05g049980.2.1 | 71       |
|                    |                    | SIPG55-2 | Solyc01g094970.2.1 | 66.7     |
| ATPG56             | AT4G23500          | SIPG56-1 | Solyc08g081480.2.1 | 69.2     |
|                    |                    | SIPG56-2 | Solyc03g007940.2.1 | 63.8     |
|                    |                    | SIPG56-3 | Solyc03g007950.2.1 | 61.9     |
| ATPG57             | AT1G19170          | SIPG57   | Solyc03g117750.2.1 | 68.8     |
| ATPG58             | AT3G42950          | SIPG58-1 | Solyc12g009210.1.1 | 72.9     |
|                    |                    | SIPG58-2 | Solyc07g042160.2.1 | 57.4     |
| ATPG59             | AT3G57790          |          |                    |          |
| ATPG60             | AT5G44830          |          |                    |          |
| ATPG61             | AT5G44840          |          |                    |          |
| ATPG62             | AT4G35670          |          |                    |          |
| ATPG63             | AT5G27530          |          |                    |          |
| ATPG64             | AT4G32370          | SIPG64   | Solyc08g060970.2.1 | 39.2     |
| ATPG65             | AT4G32375          |          |                    |          |
| ATPG66             | AT4G32380          |          |                    |          |
| ATPG67             | AT3G15720          |          |                    |          |
| ATPG68             | AT5G17200          | SIPG68   | Solyc03g116580.2.1 | 40.4     |
| ATPG69             | AT5G39910          | SIPG69   | Solyc03g113230.1.1 | 38.6     |
| ATPG70             | AT1G80140          | SIPG70   | Solyc12g009420.1.1 | 35.7     |
| ATPG71             | AT4G20050          | SIPG71   | Solyc02g068400.2.1 | 62.4     |

**Table S3.** A summary of the number of SIPG genes belonged to different clades and groups in our phylogenetic and expression pattern analysis.

|         | Group I | Group II | Group III | Group IV | Group V | Group VI | Total |
|---------|---------|----------|-----------|----------|---------|----------|-------|
| Clade A | 2       | 0        | 0         | 1        | 3       | 0        | 6     |
| Clade B | 2       | 1        | 2         | 0        | 1       | 1        | 7     |
| Clade C | 0       | 0        | 2         | 7        | 5       | 0        | 14    |
| Clade D | 0       | 0        | 0         | 5        | 3       | 2        | 10    |
| Clade E | 8       | 0        | 2         | 0        | 1       | 1        | 12    |
| Clade F | 1       | 1        | 0         | 0        | 2       | 0        | 4     |
| Clade G | 0       | 0        | 0         | 0        | 1       | 0        | 1     |
| Total   | 13      | 2        | 6         | 13       | 16      | 4        | 54    |

**Table S4.** The putative *cis*-acting regulatory elements of plant hormones response, environmental stress response and specific organ/tissue development presented in the 5'-upstream region (1.5kb) of the polygalacturonase genes in *Solanum lycopersicum*.

| Name                                               | Putative <i>cis</i> -element | Sequence      | Probable fuction                                                    |
|----------------------------------------------------|------------------------------|---------------|---------------------------------------------------------------------|
| Plant hormones response related elements           |                              |               |                                                                     |
| a1                                                 | TGA-element                  | AACGAC        | auxin-responsive element                                            |
| a2                                                 | TGA-box                      | TGACGTAA      | part of an auxin-responsive element                                 |
| a3                                                 | AuxRR-core                   | GGTCCAT       | cis-acting regulatory element involved in auxin responsiveness      |
| g1                                                 | GARE-motif                   | AAACAGA       | gibberellin-responsive element                                      |
| g2                                                 | P-box                        | CCTTTTG       | gibberellin-responsive element                                      |
| g3                                                 | TATC-box                     | TATCCCA       | cis-acting element involved in gibberellin-responsiveness           |
| aa                                                 | ABRE                         | TACGTG        | cis-acting element involved in the abscisic acid responsiveness     |
| et                                                 | ERE                          | ATTTCAAA      | ethylene-responsive element                                         |
| j1                                                 | CGTCA-motif                  | CGTCA         | cis-acting regulatory element involved in the MeJA-responsiveness   |
| j2                                                 | TGACG-motif                  | TGACG         | cis-acting regulatory element involved in the MeJA-responsiveness   |
| sa                                                 | TCA-element                  | CCATCTTTT     | cis-acting element involved in salicylic acid responsiveness        |
| Environmental stress response related elements     |                              |               |                                                                     |
| ai                                                 | ARE                          | TGGTTT        | cis-acting regulatory element essential for the anaerobic induction |
| an                                                 | GC-motif                     | CCCCCG        | enhancer-like element involved in anoxic specific inducibility      |
| he                                                 | HSE                          | AAAAAATTC     | cis-acting element involved in heat stress responsiveness           |
| lo                                                 | LTR                          | CCGAAA        | cis-acting element involved in low-temperature responsiveness       |
| dr                                                 | MBS                          | TAACTG        | MYB binding site involved in drought-inducibility                   |
| de                                                 | TC-rich repeats              | ATTTTCTCCA    | cis-acting element involved in defense and stress responsiveness    |
| wr                                                 | WUN-motif                    | TCATTACGAA    | wound-responsive element                                            |
| fe                                                 | Box-W1                       | TTGACC        | fungal elicitor responsive element                                  |
| Specific organ/tissue development related elements |                              |               |                                                                     |
| m1                                                 | CAT-box                      | GCCACT        | cis-acting regulatory element related to meristem expression        |
| m2                                                 | CCGTCC-box                   | CCGTCC        | cis-acting regulatory element related to meristem specific          |
| mm                                                 | HD-Zip 1                     | CAAT(A/T)ATTG | element involved in differentiation of the palisade mesophyll cells |
| lm                                                 | HD-Zip 2                     | CAAT(G/C)ATTG | element involved in the control of leaf morphology development      |
| se                                                 | RY-element                   | CATGCATG      | cis-acting regulatory element involved in seed-specific regulation  |
| e1                                                 | Skn-1_motif                  | GTCAT         | cis-acting regulatory element required for endosperm expression     |
| e2                                                 | GCN4_motif                   | CAAGCCA       | cis-regulatory element involved in endosperm expression             |
| e3                                                 | AACA_motif                   | TAACAACTCC    | involved in endosperm-specific negative expression                  |

**Table S5.** The types and number of putative *cis*-acting regulatory elements presented in the 5'-upstream region of the polygalacturonase genes in *S. lycopersicum*.

| Gene             | Plant Hormone Response Elements | Number | Environmental Stress Response Elements | Number | Specific Organ/Tissue Development Elements | Number |
|------------------|---------------------------------|--------|----------------------------------------|--------|--------------------------------------------|--------|
| <b>Group IV</b>  |                                 |        |                                        |        |                                            |        |
| SIPG24-1         | g2                              | 1      | de                                     | 1      |                                            |        |
|                  | g3                              | 3      | he                                     | 1      |                                            |        |
|                  | sa                              | 1      | fe                                     | 1      |                                            |        |
| SIPG24-4         | g1                              | 1      | de                                     | 1      | e1                                         | 2      |
|                  | j1                              | 2      | he                                     | 1      | e3                                         | 1      |
|                  |                                 | 1      | fe                                     | 1      |                                            |        |
|                  |                                 |        | ai                                     | 1      |                                            |        |
| SIPG38-1         |                                 |        | de                                     | 2      |                                            |        |
|                  |                                 |        | he                                     | 1      |                                            |        |
|                  |                                 |        | ai                                     | 1      |                                            |        |
|                  |                                 |        | lo                                     | 1      |                                            |        |
| SIPG24-5         |                                 |        | de                                     | 1      | m2                                         | 1      |
|                  |                                 |        | he                                     | 2      |                                            |        |
| SIPG44           | a3                              | 1      | ai                                     | 1      | e1                                         | 1      |
|                  | aa                              | 1      | dr                                     | 2      |                                            |        |
| SIPG45           | j1                              | 1      | an                                     | 1      |                                            |        |
|                  | j2                              | 2      | he                                     | 1      |                                            |        |
|                  | g1                              | 1      | de                                     | 1      |                                            |        |
| SIPG8            | j2                              | 2      | ai                                     | 1      | mm                                         | 1      |
|                  | g3                              | 1      | fe                                     | 1      | lm                                         | 1      |
|                  | aa                              | 1      | he                                     | 1      |                                            |        |
| SIPG20-2         | aa                              | 3      | ai                                     | 1      | e1                                         | 3      |
|                  | j1                              | 4      | de                                     | 2      |                                            |        |
|                  |                                 |        | fe                                     | 2      |                                            |        |
|                  |                                 |        | he                                     | 2      |                                            |        |
|                  |                                 |        | dr                                     | 1      |                                            |        |
| SIPG24-7         | a1                              | 1      | ai                                     | 1      |                                            |        |
|                  | j1                              | 1      | de                                     | 1      |                                            |        |
| SIPG38-2         | j2                              | 1      | de                                     | 1      |                                            |        |
|                  | et                              | 1      | dr                                     | 1      |                                            |        |
| SIPG24-9         | j1                              | 1      | ai                                     | 1      |                                            |        |
|                  | g1                              | 1      | de                                     | 3      |                                            |        |
|                  | et                              | 1      | he                                     | 1      |                                            |        |
| SIPG24-8         | aa                              | 1      | lo                                     | 1      | e1                                         | 1      |
|                  | et                              | 2      | he                                     | 1      |                                            |        |
|                  |                                 |        | fe                                     | 1      |                                            |        |
| SIPG36           | a1                              | 1      | wr                                     | 1      | lm                                         | 1      |
|                  | sa                              | 1      |                                        |        | e1                                         | 2      |
| <b>Group VI</b>  |                                 |        |                                        |        |                                            |        |
| SIPG37-4         | aa                              | 1      | de                                     | 1      | e1                                         | 1      |
|                  | a3                              | 1      | dr                                     | 2      | e2                                         | 1      |
|                  | j1                              | 1      |                                        |        |                                            |        |
| SIPG43           |                                 |        | ai                                     | 1      | e1                                         | 1      |
|                  |                                 |        | de                                     | 1      |                                            |        |
|                  |                                 |        | he                                     | 1      |                                            |        |
| SIPG16           | g1                              | 2      | de                                     | 1      | e1                                         | 2      |
|                  |                                 |        | he                                     | 2      |                                            |        |
|                  |                                 |        | dr                                     | 1      |                                            |        |
|                  |                                 |        | fe                                     | 1      |                                            |        |
|                  |                                 |        | wr                                     | 1      |                                            |        |
| SIPG49           | j2                              | 1      | ai                                     | 1      |                                            |        |
|                  | sa                              | 1      | de                                     | 1      |                                            |        |
|                  |                                 |        | he                                     | 1      |                                            |        |
|                  |                                 |        | dr                                     | 1      |                                            |        |
| <b>Group III</b> |                                 |        |                                        |        |                                            |        |
| SIPG24-6         | aa                              | 1      | de                                     | 1      | e1                                         | 2      |
|                  |                                 |        | dr                                     | 1      |                                            |        |
| SIPG21-3         |                                 |        | de                                     | 1      |                                            |        |

Table S5 continued

| Table S5 continued |                                 |                       |                                        |        |                                            |        |   |
|--------------------|---------------------------------|-----------------------|----------------------------------------|--------|--------------------------------------------|--------|---|
| Gene               | Plant hormone response elements | Number                | Environmental stress response elements | Number | Specific organ/tissue development elements | Number |   |
| SIPG56-3           | aa<br>j1                        | 1<br>1                | he                                     | 2      | e1                                         | 1      |   |
|                    |                                 |                       | dr                                     | 1      |                                            |        |   |
|                    |                                 |                       | de                                     | 1      |                                            |        |   |
|                    |                                 |                       | he                                     | 1      |                                            |        |   |
| SIPG56-2           | j1<br>j2                        | 1<br>1                | lo                                     | 1      |                                            |        |   |
|                    |                                 |                       | he                                     | 4      |                                            |        |   |
|                    |                                 |                       | dr                                     | 2      |                                            |        |   |
| SIPG15             | j1<br>j2<br>aa                  | 3<br>4<br>1           |                                        |        | e2                                         | 1      |   |
|                    |                                 |                       |                                        |        |                                            |        |   |
|                    |                                 |                       |                                        |        |                                            |        |   |
| SIPG17-2           | a2<br>j2                        | 1<br>2                |                                        |        | m1                                         | 1      |   |
|                    |                                 |                       |                                        |        |                                            |        |   |
|                    |                                 |                       |                                        |        |                                            |        |   |
| Group V            |                                 |                       |                                        |        |                                            |        |   |
| SIPG24-3           |                                 |                       | ai                                     | 1      | e1                                         | 1      |   |
|                    |                                 |                       | de                                     | 1      |                                            |        |   |
|                    |                                 |                       | dr                                     | 1      |                                            |        |   |
|                    |                                 |                       | lo                                     | 1      |                                            |        |   |
| SIPG4              | j1<br>g1<br>g2                  | 1<br>1<br>1           | ai                                     | 1      | e1                                         | 1      |   |
|                    |                                 |                       | de                                     | 1      |                                            |        |   |
|                    |                                 |                       | dr                                     | 2      |                                            |        |   |
| SIPG11             |                                 |                       | ai                                     | 1      | e1                                         | 4      |   |
|                    |                                 |                       | he                                     | 1      |                                            |        |   |
|                    |                                 |                       | fe                                     | 1      |                                            |        |   |
| SIPG69             | j1<br>g1<br>sa                  | 1<br>1<br>1           | de                                     | 1      | e1                                         | 1      |   |
|                    |                                 |                       | fe                                     | 1      | m1                                         | 1      |   |
|                    |                                 |                       |                                        |        |                                            |        |   |
| SIPG21-2           | aa<br>a1<br>j1<br>j2<br>g3      | 1<br>1<br>1<br>1<br>2 | fe                                     | 1      | e1                                         | 1      |   |
|                    |                                 |                       |                                        |        |                                            | e2     | 1 |
|                    |                                 |                       |                                        |        |                                            |        |   |
|                    |                                 |                       |                                        |        |                                            |        |   |
|                    |                                 |                       |                                        |        |                                            |        |   |
| SIPG21-1           | aa<br>a1<br>et<br>j2            | 2<br>1<br>1<br>2      | lo                                     | 2      | e1                                         | 2      |   |
|                    |                                 |                       |                                        |        |                                            |        |   |
|                    |                                 |                       |                                        |        |                                            |        |   |
|                    |                                 |                       |                                        |        |                                            |        |   |
| SIPG7              | aa<br>a1                        | 1<br>1                | ai                                     | 1      |                                            |        |   |
|                    |                                 |                       | dr                                     | 1      |                                            |        |   |
|                    |                                 |                       | he                                     | 1      |                                            |        |   |
|                    |                                 |                       | lo                                     | 1      |                                            |        |   |
| SIPG37-2           | aa<br>sa<br>et                  | 2<br>1<br>1           | he                                     | 1      |                                            |        |   |
|                    |                                 |                       | dr                                     | 2      |                                            |        |   |
|                    |                                 |                       |                                        |        |                                            |        |   |
| SIPG12-1           | sa                              | 1                     | ai                                     | 2      | e2                                         | 1      |   |
|                    |                                 |                       | de                                     | 1      | se                                         | 1      |   |
|                    |                                 |                       | he                                     | 1      |                                            |        |   |
|                    |                                 |                       | lo                                     | 1      |                                            |        |   |
| SIPG24-2           |                                 |                       | dr                                     | 1      | m2                                         | 1      |   |
|                    |                                 |                       | fe                                     | 2      |                                            |        |   |
|                    |                                 |                       |                                        |        |                                            |        |   |
| SIPG37-1           | j1<br>g1<br>g3<br>sa            | 1<br>1<br>1<br>1      | ai                                     | 2      |                                            |        |   |
|                    |                                 |                       | de                                     | 2      |                                            |        |   |
|                    |                                 |                       | he                                     | 1      |                                            |        |   |
|                    |                                 |                       |                                        |        |                                            |        |   |
| SIPG48-1           | g2                              | 1                     | ai                                     | 1      | e1                                         | 1      |   |
|                    |                                 |                       | fe                                     | 1      |                                            |        |   |
|                    |                                 |                       |                                        |        |                                            |        |   |
| SIPG68             | a1                              | 1                     | ai                                     | 1      |                                            |        |   |
|                    |                                 |                       | de                                     | 1      |                                            |        |   |
|                    |                                 |                       |                                        |        |                                            |        |   |
| SIPG20-1           | j2<br>g2<br>er                  | 1<br>1<br>2           | de                                     | 3      | e1                                         | 3      |   |
|                    |                                 |                       | he                                     | 1      | mm                                         | 1      |   |
|                    |                                 |                       | fe                                     | 1      | lm                                         | 1      |   |
| SIPG71             | g3<br>sa                        | 1<br>1                | de                                     | 3      | e1                                         | 2      |   |
|                    |                                 |                       | he                                     | 2      |                                            |        |   |
| SIPG37-3           | ji                              | 1                     | ai                                     | 2      | e1                                         | 3      |   |

Table S5 continued

| Gene            | Plant hormone response elements | Number | Environmental stress response elements | Number | Specific organ/tissue development elements | Number |
|-----------------|---------------------------------|--------|----------------------------------------|--------|--------------------------------------------|--------|
| <b>Group II</b> | aa                              | 1      | fe                                     | 1      |                                            |        |
| SIPG14          | sa                              | 1      | de                                     | 2      | e1                                         | 1      |
|                 |                                 |        | he                                     | 1      | e2                                         | 1      |
|                 |                                 |        | fe                                     | 1      | m2                                         | 1      |
| SIPG70          | aa                              | 1      | de                                     | 1      |                                            |        |
|                 | sa                              | 1      | he                                     | 1      |                                            |        |
|                 |                                 |        | wr                                     | 1      |                                            |        |
| <b>Group I</b>  |                                 |        |                                        |        |                                            |        |
| SIPG17-1        |                                 |        | de                                     | 2      | e2                                         | 1      |
|                 |                                 |        | he                                     | 1      |                                            |        |
|                 |                                 |        | fe                                     | 1      |                                            |        |
|                 |                                 |        | lo                                     | 1      |                                            |        |
| SIPG64          | aa                              | 1      | he                                     | 1      |                                            |        |
|                 | j2                              | 1      |                                        |        |                                            |        |
|                 | sa                              | 1      |                                        |        |                                            |        |
| SIPG12-2        | sa                              | 2      | ai                                     | 2      | e2                                         | 2      |
|                 |                                 |        | dr                                     | 2      |                                            |        |
| SIPG6           | aa                              | 3      | de                                     | 1      | e1                                         | 3      |
|                 | j1                              | 1      |                                        |        |                                            |        |
|                 | j2                              | 1      |                                        |        |                                            |        |
|                 | sa                              | 1      |                                        |        |                                            |        |
| SIPG9           | aa                              | 1      | ai                                     | 1      | e1                                         | 2      |
|                 | j1                              | 1      | dr                                     | 1      |                                            |        |
|                 | g1                              | 1      | fe                                     | 1      |                                            |        |
|                 | sa                              | 1      | he                                     | 4      |                                            |        |
|                 |                                 |        | wr                                     | 1      |                                            |        |
| SIPG58-1        | aa                              | 1      | ai                                     | 1      | e1                                         | 2      |
|                 | a1                              | 1      | de                                     | 1      |                                            |        |
|                 | j1                              | 1      |                                        |        |                                            |        |
| SIPG58-2        | a3                              | 1      | ai                                     | 2      | e1                                         | 2      |
|                 | j1                              | 1      | fe                                     | 1      | ml                                         | 1      |
| SIPG48-2        | sa                              | 2      | ai                                     | 2      | e1                                         | 1      |
|                 |                                 |        | de                                     | 3      | ml                                         | 1      |
|                 |                                 |        | dr                                     | 1      |                                            |        |
|                 |                                 |        | he                                     | 1      |                                            |        |
| SIPG57          |                                 |        | de                                     | 1      | e2                                         | 1      |
|                 |                                 |        | dr                                     | 1      | ml                                         | 2      |
|                 |                                 |        | he                                     | 1      |                                            |        |
| SIPG52          | g1                              | 1      | he                                     | 1      | e1                                         | 1      |
| SIPG55-1        | et                              | 1      | ai                                     | 1      | e1                                         | 2      |
| SIPG56-1        | j1                              | 1      |                                        |        | e1                                         | 2      |
|                 | g3                              | 1      |                                        |        |                                            |        |
| SIPG55-2        | aa                              | 1      | dr                                     | 1      | e1                                         | 4      |
|                 | g2                              | 1      | he                                     | 1      | e2                                         | 1      |
|                 |                                 |        | lo                                     | 1      | e3                                         | 1      |
|                 |                                 |        |                                        |        | ml                                         | 1      |



**Table S6.** Primers used in qRT-PCR analysis of PG genes in *Solanum lycopersicum*.

| Gene Name                 | Primer Name    | Primer Sequences (5'-3') |
|---------------------------|----------------|--------------------------|
| <i>SIPG4</i>              | SIPG4 Fp       | TGCTGTTTCAGATATTGAA      |
|                           | SIPG4Rp        | GCAAAGTTCATGTCTGAG       |
| <i>SIPG6</i>              | SIPG6 Fp       | AAATGTTGAGATTGAAGCAG     |
|                           | SIPG6 Rp       | ATCGCGAATAATGGCGTTAC     |
| <i>SIPG7</i>              | SIPG7 Fp       | TTACAGTGAAGATTCAACT      |
|                           | SIPG7 Rp       | TGTTGTTGAAATTAATGTTG     |
| <i>SIPG8</i>              | SIPG8 Fp       | GGCTGTTCAAGTTTATGGGA     |
|                           | SIPG10 Rp      | ATACAGTCATCTCCACAAGC     |
| <i>SIPG9</i>              | SIPG9 Fp       | CTAAAGCCAATACAGGAGCG     |
|                           | SIPG9 Rp       | TGCTTGAATCTTGTTGCTCG     |
| <i>SIPG11</i>             | SIPG11 Fp      | ACCAAACCAATTCATCTAGC     |
|                           | SIPG11 Rp      | GCAAGTTGATTAATTCCTCG     |
| <i>SIPG12-1</i>           | SIPG12-1 Fp    | TATACTGTAACCTCCGCCACG    |
|                           | SIPG12-1 Rp    | AACCTAAATCATAGTTTCATC    |
| <i>SIPG12-2</i>           | SIPG12-2 Fp    | CACAGGGATTGGTTATGGTT     |
|                           | SIPG12-2 Rp    | CGATGTATTCTTCCCTTGGT     |
| <i>SIPG14</i>             | SIPG14 Fp      | TGCTCATGATTTCAAGCTT      |
|                           | SIPG14 Rp      | TTTTCCATCACCCCTAGCTC     |
| <i>SIPG15</i>             | SIPG15 Fp      | TCATTTTAAAGCTTATCCTT     |
|                           | SIPG15 Rp      | CTTCTTCATTGAATTCTCC      |
| <i>SIPG16</i>             | SIPG16 Fp      | TCATGGTCCTTGTAAGAAAG     |
|                           | SIPG16 Rp      | TGGAATAAAAGCCAATGTCT     |
| <i>SIPG17-1</i>           | SIPG17-1 Fp    | TTCTCGTCTTATTCCAAATC     |
|                           | SIPG17-1 Rp    | GGTCTCTAAAGAAGCAGATG     |
| <i>SIPG17-2</i>           | SIPG17-2 Fp    | CTTGGCAGGGAGGTAGAGGG     |
|                           | SIPG17-2 Rp    | TGATTTGGGCAGGGGAATGG     |
| <i>SIPG20-1</i>           | SIPG20-1 Fp    | CTACCATTATGTTCACGT       |
|                           | SIPG20-1 Rp    | AGATGGAGCCACTAGGGTTC     |
| <i>SIPG20-2</i>           | SIPG20-2 Fp    | GTAAAGTAATAGCCCCAGA      |
|                           | SIPG20-2 Rp    | CTCCAGTTTTGATTCTACAA     |
| <i>SIPG21-1/ SIPG21-2</i> | SIPG21-1/-2 Fp | TACAAGAATGTGAAAGGGAC     |
|                           | SIPG21-1/-2 Rp | TCGTCTTAAACGATCGTTGT     |
| <i>SIPG21-3</i>           | SIPG21-3 Fp    | AAAGGGGACATCATCAACAC     |
|                           | SIPG21-3 Rp    | TTTCAAACGAGGATCCACAA     |
| <i>SIPG24-1/ SIPG24-4</i> | SIPG24-1/-4 Fp | TGTCATAACGCGATGATACA     |
|                           | SIPG24-1/-4 Rp | CATAATACTAACTCCTGAGGAT   |
| <i>SIPG24-2</i>           | SIPG24-2 Fp    | TGGTACTTTAGTGGCTCCCT     |
|                           | SIPG24-2 Rp    | CCAAAGATTAGCACCTTGAC     |
| <i>SIPG24-3</i>           | SIPG24-3 Fp    | CGTTGCGATGATTGATGTTGA    |
|                           | SIPG24-3 Rp    | CACCTACTTTCACGCCCGAGA    |
| <i>SIPG24-5</i>           | SIPG24-5 Fp    | TATACACGGAACATCGGCTAC    |
|                           | SIPG24-5 Rp    | GCTTTAGTCGGATGATCATTG    |
| <i>SIPG24-6</i>           | SIPG24-6 Fp    | GGGAAGTTATCTATTGAACA     |
|                           | SIPG24-6 Rp    | ATTAAATCCAGTTACCAGAT     |
| <i>SIPG24-7</i>           | SIPG24-7 Fp    | CAAGGAAGTTACTTGCTTAA     |
|                           | SIPG24-7 Rp    | ATTGATCCAATTTTCTCG       |
| <i>SIPG24-8/ SIPG24-9</i> | SIPG24-8/-9 Fp | GGAACATCGGCTACAGAAGT     |
|                           | SIPG24-8/-9 Rp | CTTCAGTCTGCTGATTTTGA     |
| <i>SIPG36</i>             | SIPG36 Fp      | AATGGGGTGAGAATTAAGAG     |
|                           | SIPG36 Rp      | GATTATTATAGGATTGAGG      |
| <i>SIPG37-1</i>           | SIPG37-1 Fp    | CCATACAATGATTGTTCAT      |
|                           | SIPG37-1 Rp    | AGAGGTTTATGTGGGAGTTC     |
| <i>SIPG37-2</i>           | SIPG37-2 Fp    | TAACATAAGTGCACCACCA      |
|                           | SIPG37-3 Rp    | CGCGATCATAGCAATACAA      |
| <i>SIPG37-3</i>           | SIPG37-3 Fp    | TCAGTTGCAGTTATGGATAT     |
|                           | SIPG37-3 Rp    | TACGGATGTTGTTGAGTTG      |
| <i>SIPG37-4</i>           | SIPG37-4 Fp    | GATTAAGACTTGGGCATCAT     |
|                           | SIPG37-4 Rp    | TAATATTGCAAGTATGTGAA     |
| <i>SIPG38-1</i>           | SIPG38-1 Fp    | GATCAAGACATGGCCTGCTT     |
|                           | SIPG38-1 Rp    | TCTTTGTTGCATTTTCCACT     |
| <i>SIPG38-2</i>           | SIPG38-2 Fp    | CAACAGGTCAGCCAGGAGTG     |
|                           | SIPG38-2 Rp    | TGATGCACATGCCTCTTTAA     |
| <i>SIPG43</i>             | SIPG43 Fp      | TTCAACAGGAGATGATTGTG     |
|                           | SIPG43 Rp      | ACATCACCTTCATTTTGTTA     |
| <i>SIPG44</i>             | SIPG44Fp       | AAGATAATACCTCCCACCA      |
|                           | SIPG44 Rp      | GCGGAAGAGGGAATTAGAAC     |
| <i>SIPG45</i>             | SIPG45 Fp      | GACCAGATCCCACTGCAGAT     |
|                           | SIPG45 Rp      | CCTGTAGTAAATGTTCTGG      |
| <i>SIPG48-1</i>           | SIPG48-1 Fp    | ATCTTACAACCTTTTACAT      |
|                           | SIPG48-1 Rp    | GTGAAGCAAGTTGAAGTAGT     |
| <i>SIPG48-2</i>           | SIPG48-2 Fp    | CATCAAAGATATTCTCATTT     |
|                           | SIPG48-2 Rp    | CCACTAACTGTAGGTAACAA     |
| <i>SIPG49</i>             | SIPG49 Fp      | GATAGTACCAATGCAATATC     |
|                           | SIPG49 Rp      | TCAAGTGTGAATTCTAAAG      |

|  |  |  |
|--|--|--|
|  |  |  |
|--|--|--|

Table S6 continued

| Gene name                 | Primer name    | Primer sequences (5'-3') |
|---------------------------|----------------|--------------------------|
| <i>SIPG52</i>             | SIPG52 Fp      | AGGAGGAATAAGGAGACCGT     |
|                           | SIPG52 Rp      | ACACTAATCCTACCCGACCC     |
| <i>SIPG55-1</i>           | SIPG55-1 Fp    | ATGGGATGCCAACAAGTCAA     |
|                           | SIPG55-1 Rp    | ATAGCCGTGATGTCCTCTGC     |
| <i>SIPG55-2</i>           | SIPG55-2 Fp    | CATTGATCATCAAACGTCT      |
|                           | SIPG55-2 Rp    | ATGGCTGTAATGTCTTGAAT     |
| <i>SIPG56-1</i>           | SIPG56-1 Fp    | TTATCATCCAAGGCATCACTATCC |
|                           | SIPG56-1 Rp    | CCACTCTTAACAGCAATACAATCA |
| <i>SIPG56-2/ SIPG56-3</i> | SIPG56-2/-3 Fp | ACAGCTCATTGTTCTCCTG      |
|                           | SIPG56-2/-3 Rp | TAAATCCCACTCTGCCTCA      |
| <i>SIPG57</i>             | SIPG57 Fp      | GCAACCTGACCCCTACAGAAT    |
|                           | SIPG57 Rp      | CTCCTTGTCACGAATACCA      |
| <i>SIPG58-1</i>           | SIPG58-1 Fp    | CCCAAAGCTGTCCCACTACT     |
|                           | SIPG58-1 Rp    | AAGTGACGTTTCTACCCAG      |
| <i>SIPG58-2</i>           | SIPG58-2 Fp    | AAATCTAAAAGGGATTCAAG     |
|                           | SIPG58-2 Rp    | TACTTCTGATCTTCCCTCGT     |
| <i>SIPG64</i>             | SIPG64 Fp      | CATTGATGTCAACCTCAGGT     |
|                           | SIPG64 Rp      | AACATTAGTGCAAGCTGTGC     |
| <i>SIPG68</i>             | SIPG68 Fp      | TCAAATGCTTGCAACCAATGA    |
|                           | SIPG68Rp       | ATCGTTACTCCCCTAACTCG     |
| <i>SIPG69</i>             | SIPG69 Fp      | TGTTTTCTGAATGTGAAATT     |
|                           | SIPG69 Rp      | ATCCATTTTAAACATGCCAA     |
| <i>SIPG70</i>             | SIPG70 Fp      | TGTCCGAGATGTCACGTTTG     |
|                           | SIPG70 Rp      | ACTCCAGTCCCGTTTCCTT      |
| <i>SIPG71</i>             | SIPG71 Fp      | AGGATGTGGATTCTTATT       |
|                           | SIPG71 Rp      | AACACCAATTATTGACTTCA     |
| <i>Ubi3</i>               | Ubi3Fp         | TCCATCTCGTGCTCCGTCT      |
|                           | Ubi3Rp         | CTGAACCTTTCAGTGTCAT      |
